1  
2  
3  
4  
5  
6  
7  
8  
9  
10  
11  
12  
13  
14  
15  
16  
17  
18  
19  
20  
21  
22  
23

# **System-level analyses of keystone genes required for mammalian tooth development**

## **Running title**

System-level analysis of tooth genes

Outi Hallikas<sup>1\*</sup>, Rishi Das Roy<sup>1\*</sup>, Mona M. Christensen<sup>1</sup>, Elodie Renvoise<sup>1,2</sup>, Ana-Marija Sulic<sup>1</sup>,  
Jukka Jernvall<sup>1,3</sup>

\*These authors contributed equally to this work.

<sup>1</sup>Institute of Biotechnology, University of Helsinki, P.O. Box 56, FI-00014 Helsinki, Finland.

<sup>2</sup>5 Rue de Portland, 72100 Le Mans, France.

<sup>3</sup>Department of Geosciences and Geography, University of Helsinki, P.O. Box 64, FI-00014 Helsinki, Finland.

Correspondence

Institute of Biotechnology, University of Helsinki, P.O. Box 56, FI-00014 Helsinki, Finland

Email: [jernvall@fastmail.fm](mailto:jernvall@fastmail.fm)

24 **Abstract**

25 When a null mutation of a gene causes a complete developmental arrest, the gene is typically  
26 considered essential for life. Yet, in most cases null mutations have more subtle effects on the  
27 phenotype. Here we used the phenotypic severity of mutations as a tool to examine system-  
28 level dynamics of gene expression. We classify genes required for the normal development of  
29 the mouse molar into different categories that range from essential to subtle modification of the  
30 phenotype. Collectively, we call these the developmental keystone genes. Transcriptome  
31 profiling using microarray and RNAseq analyses of patterning stage mouse molars show highly  
32 elevated expression levels for genes essential for the progression of tooth development, a  
33 result reminiscent of essential genes in single cell organisms. Elevated expression levels of  
34 progression genes were also detected in developing rat molars, suggesting evolutionary  
35 conservation of this system-level dynamics. Single-cell RNAseq analyses of developing mouse  
36 molars reveal that even though the size of the expression domain, measured in number of  
37 cells, is the main driver of organ-level expression, progression genes show high cell-level  
38 transcript abundances. Progression genes are also upregulated within their pathways, which  
39 themselves are highly expressed. In contrast, a high proportion of the genes required for  
40 normal tooth patterning are secreted ligands that are expressed in fewer cells than their  
41 receptors and intracellular components. Overall, even though expression patterns of individual  
42 genes can be highly different, conserved system-level principles of gene expression can be  
43 detected using phenotypically defined gene categories.

44

45 **Keywords**

46 Tooth development, transcriptomes, keystone genes, essential genes, single-cell RNAseq,  
47 transcript abundance

48

49

50

51

52

53

## 54 **1 | INTRODUCTION**

55 Much of the functional evidence for the roles of developmental genes comes from natural  
56 mutants or experiments in which the activity of a gene is altered. Most often these experiments  
57 involve deactivation, or a null mutation where the production of a specific gene product is  
58 prevented altogether. In the cases where development of an organism is arrested, the specific  
59 gene is considered to be absolutely required or essential for development (Amsterdam et al.,  
60 2004; Dickinson et al., 2016). Through a large number of experiments in different organisms, an  
61 increasingly nuanced view of developmental regulation has emerged showing that some genes  
62 appear to be absolutely required, whereas others may cause milder effects on the phenotype  
63 (Brown et al., 2018; Bogue et al., 2018). Yet, there are a large number of genes that, despite  
64 being dynamically regulated during individual organ development, have no detectable  
65 phenotypic effect when null mutated.

66

67 Within the framework of distinct phenotypic outcomes of gene deactivation it can be argued that  
68 there is a gradation from developmentally 'more essential' to 'less essential' genes. Collectively,  
69 these can be considered to be analogous to the keystone species concept used in ecology (Paine,  
70 1969; Terborgh, 1986). These genes, which can be called 'developmental keystone genes', are  
71 not necessarily essential for development. Rather, compared to all the genes, developmental  
72 keystone genes exert a disproportional effect on the phenotype.

73

74 As large-scale analyses of transcriptomes produce expression profiles for individual organs at  
75 the organ and single-cell level, it is now possible to address whether there might be any system-  
76 level differences between the regulation of essential and other keystone genes during  
77 organogenesis. Here we address such differences using the mammalian tooth. Especially the  
78 development of the mouse molar is well characterized, with over 70 genes that are known to be  
79 individually required for normal tooth development (Bei, 2009; Nieminen, 2009; Harjunmaa et  
80 al., 2012). The dynamic expression patterns and detailed effects of null mutations of these genes  
81 are also exceedingly well characterized, ranging from a complete developmental arrest to  
82 relatively mild modifications of morphology, or defects in the mineralized hard tissue  
83 (Nieminen, Pekkanen, Aberg, & Thesleff, 1998; Nieminen, 2009; Harjunmaa et al., 2012). By

84 classifying these genes into different categories (Figure 1), we investigated whether there are  
85 any differences in the expression of different gene categories.

86

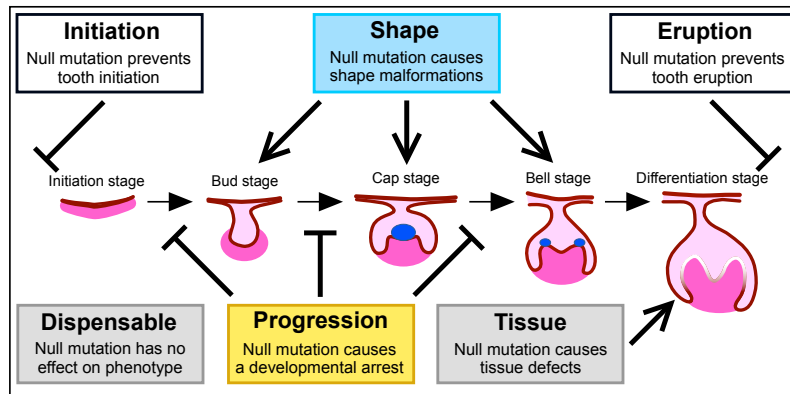

87

88 **Figure 1** Keystone gene categories of tooth development. Mouse molar development progresses from  
89 initiation and patterning to formation of the hard tissues and eruption. These steps are mediated by  
90 reciprocal signaling between epithelium (pink) and mesenchyme (magenta). A central step in the  
91 patterning is the formation of the epithelial signaling center, the primary enamel knot (blue oval inside the  
92 cap stage tooth). Several genes are known to be required for the developmental progression and  
93 regulation of the shape around the time of cap stage, and here we focused mainly on transcriptomes in  
94 the bud, and cap stage molars. Expression of progression and shape category genes were compared to  
95 tissue and dispensable genes, as also to other developmental process genes. Fewer initiation and  
96 eruption category genes are known, and they were excluded from the analyses. For listing of the genes,  
97 see Appendix S1 and Table S1.

98

## 99 **2 | MATERIALS AND METHODS**

### 100 **2.1 | Classification of developmental keystone genes**

101 Here our main focus is on a critical step in tooth development, namely the formation of the cap  
102 stage tooth germ (Figure 1). At this stage the patterning of tooth crown begins, and the effects of  
103 experimental modifications in several signaling pathways first manifest themselves around this  
104 time of development (Jernvall & Thesleff, 2012). To classify the studied genes, we divide them  
105 into different categories based on our analysis of published experiments. Our classification  
106 scheme is based on the phenotype of the mouse where that gene is knocked out. Thus, the  
107 classification of each gene is based on in vivo experiments. Operationally, our classification  
108 applies only to our organ of interest even though classification following the same logic could  
109 be done for any organ. This single organ focus also means that genes that have no effect in one

110 organ may be critical for the development of another organ. Because many developmental genes  
111 function in multiple organs and stages during development, full mutants of several genes are  
112 lethal before tooth development even begins. Therefore, when available, we also used  
113 information on the tooth phenotypes of conditional mutant mice. We note that whereas the  
114 keystone gene terminology has also been considered within the context of their effects on  
115 ecosystems (Skovmand et al., 2018), here we limit the explanatory level to a specific organ  
116 system.

117

118 The first category is the **progression category** containing essential genes that cause a  
119 developmental arrest of the tooth when null mutated (Figure 1, genes with references in  
120 Appendix S1). The second set of genes belongs to the **shape category** and they alter the  
121 morphology of the tooth when null mutated. Unlike the null-mutations of progression genes,  
122 many shape gene mutations cause subtle modifications of teeth that remain functional, hence  
123 these genes are not strictly essential for tooth development. The third category is the **tissue**  
124 **category** and null mutations in these genes cause defects in the tooth hard tissues, enamel and  
125 dentine. Both the progression and shape categories include genes that are required for normal  
126 cap-stage formation. In contrast, the tissue category is principally related to the formation of  
127 extracellular matrix and these genes are known to be needed much later in the development  
128 (Nieminen et al. 1998). Because there is more than a five-day delay from the cap-stage to matrix  
129 secretion in the mouse molar, here we considered the tissue category as a control for the first  
130 two categories.

131

132 Additionally, we compiled a second control set of developmental genes that, while expressed  
133 during tooth development, are reported to lack phenotypic effects when null mutated (Table S1).  
134 This **dispensable category** is defined purely within our operational framework of identifiable  
135 phenotypic effects and we do not imply that these genes are necessarily unimportant even within  
136 the context of tooth development. Many genes function in concert and the effects of their  
137 deletion only manifest when mutated in combinations (also known as synthetic mutations).  
138 Some dispensable genes may function in combinations even though no such evidence exists as  
139 yet. We identified five such redundant pairs of paralogous genes and a single gene whose null  
140 phenotype surfaces in heterozygous background of its paralogue. Altogether these 11 genes  
141 were tabulated separately as a **double category**. In the progression, shape, tissue, and

142 dispensable categories we tabulated 15, 28, 27, and 100 genes respectively (Figure 1, Appendix  
143 S1, Table S1). While still limited, these genes should represent a robust classification of  
144 validated experimental effects. We note that these groupings do not exclude the possibility that  
145 a progression gene, for example, can also be required for normal hard tissue formation.  
146 Therefore, the keystone gene categories can be considered to reflect the temporal order in which  
147 they are first required during odontogenesis. Moreover, many of the 100 dispensable category  
148 genes could belong to the double category, but finding them would require testing close to 5 000  
149 transgenic combinations to test.

150

151 In addition to the categories studied here, there are genes required for the initiation of tooth  
152 development, of which many are also potentially involved in tooth renewal. Because the  
153 phenotypic effect of these initiation genes on tooth development precedes the visible  
154 morphogenesis, and the phenotype might include complete lack of cells of the odontogenic  
155 lineage, we excluded these genes from our analyses. Similarly, we excluded genes preventing  
156 tooth eruption with no specific effect on the tooth itself (Appendix S1).

157

158 To examine our gene categories in the context of whole transcriptomes, we compared the  
159 expression levels with all the developmental-process genes (GO:0032502; Ashburner et al.,  
160 2000), as also with all the other protein coding genes. The developmental-process genes with  
161 GO term "GO:0032502" and experimental evidence codes were obtained from R package  
162 "org.Mm.eg.db" (Carlson, 2019). Only curated RefSeq genes are used in this study. All  
163 tabulations are found in Appendix S1 and Table S1, and S4. For the analyses of rat teeth, the  
164 classification of mouse genes was transferred to one-to-one orthologs of rat genome. The data of  
165 orthologs were downloaded from Ensembl server using R package "biomart" (Durinck et al.,  
166 2005).

167

168 For the analyses of pathways, we created a manually curated list of genes in the six key  
169 pathways (Wnt, Tgf $\beta$ , Fgf, Hh, Eda, Notch) and allocated the genes into these pathways where  
170 appropriate. Genes were also classified as 'ligand' (signal), 'receptor', 'intracellular molecule',  
171 'transcription factor' or 'other'. Because these kinds of classifications are not always trivial as  
172 some biological molecules have multiple functions in the cell, we used the inferred primary role  
173 in teeth.

174

## 175 **2.2 | Ethics statement**

176 All mouse and rat studies were approved and carried out in accordance with the guidelines of  
177 the Finnish national animal experimentation board under licenses KEK16-021,

178 ESAVI/2984/04.10.07/2014 and ESAV/2363/04.10.07/2017.

179

## 180 **2.3 | Dissection of teeth**

181 Wild type tooth germs were dissected from mouse embryonic stages corresponding to E13, E14  
182 and E16 molars. For bulk and single-cell RNAseq we used C57BL/6JOLA<sup>Hsd</sup> mice, and for  
183 microarray we used NMRI mice. The wild type rat tooth germs were dissected from DA/HanRj  
184 rat embryonic stages E15 and E17, which correspond morphologically to E13 and E14 mouse  
185 molars (mouse and rat molars are relatively similar in shape). Minimal amount of surrounding  
186 tissue was left around the tooth germ, at the same time making sure that the tooth was not  
187 damaged in the process. The tissue was immediately stored in RNAlater (Qiagen GmbH,  
188 Hilden, Germany) in -80°C for RNAseq or in TRI Reagent (Merck, Darmstadt, Germany) in -  
189 80°C for microarray. For microarray, a few tooth germs were pooled for each sample and five  
190 biological replicas were made. For RNAseq, each tooth was handled individually. Seven  
191 biological replicates were made for mouse and five biological replicates for rat. Numbers of left  
192 and right teeth were balanced.

193

## 194 **2.4 | RNA extraction**

195 The tooth germ was homogenised into TRI Reagent (Merck, Darmstadt, Germany) using  
196 Precellys 24-homogenizer (Bertin Instruments, Montigny-le-Bretonneux, France). The RNA  
197 was extracted by guanidium thiocyanate-phenol-chloroform method and then further purified by  
198 RNeasy Plus micro kit (Qiagen GmbH, Hilden, Germany) according to manufacturer's  
199 instructions. The RNA quality was assessed for some samples with 2100 Bioanalyzer (Agilent,  
200 Santa Clara, CA) and all the RIN values were above 9. The purity of RNA was analysed by  
201 Nanodrop microvolume spectrophotometer (ThermoFisher Scientific, Waltham, USA). RNA  
202 concentration was measured by Qubit 3.0 Fluorometer (ThermoFisher Scientific, Waltham,  
203 USA). The cDNA libraries were prepared with Ovation Mouse RNAseq System or Ovation Rat  
204 RNAseq System (Tecan, Zürich, Switzerland).

205

## 206 **2.5 | Bulk RNA expression analysis**

207 Gene expression levels were measured both in microarray (Affymetrix Mouse Exon Array 1.0,  
208 GPL6096) and RNAseq (platforms GPL19057, Illumina NextSeq 500). The microarray gene  
209 signals were normalized with *aroma.affymetrix* (Bengtsson, Irizarry, Carvalho, & Speed, 2008)  
210 package using *Brainarray* custom CDF (Version 23, released on Aug 12, 2019) (Dai et al.,  
211 2005). The RNAseq reads (84 bp) of mouse and rat were evaluated and bad reads are filtered  
212 out using *FastQC* (Andrews et al., 2012), *AfterQC* (Chen et al., 2017) and *Trimmomatic*  
213 (Bolger, Lohse, & Usadel, 2014). This resulted on average 63 million reads per mouse sample  
214 and 45 million reads per rat sample. Good reads for mouse and rat were aligned with *STAR*  
215 (Dobin et al., 2013) to GRCm38 (mm10/Ensembl release 90) and *Rnor\_6.0* (Ensembl release  
216 101), respectively. Counts for each gene were performed by *HTSeq* (Anders, Pyl, & Huber,  
217 2015) tool. Results are shown without normalization of gene expression based on gene length as  
218 it does not change the pattern of results. On average 85% of reads were uniquely mapped to the  
219 genome.

220

## 221 **2.6 | Single-cell RNA sequencing**

222 Single cell RNA sequencing was performed on mouse E14 cap stage tooth cells. The teeth were  
223 dissected as described above. Each tooth was processed individually in the single-cell  
224 dissociation. In total 4 teeth were analyzed. Each tooth germ was treated with 0.1 mg/ml  
225 *liberase* (Roche, Basel, Switzerland) in Dulbecco's solution for 15 min at 28°C in shaking at  
226 300 rpm followed by gentle pipetting to detach the mesenchymal cells. Then the tissue  
227 preparation was treated with *TrypLE Select* (Life Technologies, Waltham, USA) for 15 min at  
228 28°C in shaking at 300 rpm followed by gentle pipetting to detach the epithelial cells. The cells  
229 were washed once in PBS with 0,04% BSA. The cells were resuspended in 50 µl PBS with  
230 0.04% BSA. We used the *Chromium single cell 3' library & gel bead Kit v3* (10x Genomics,  
231 Pleasanton, USA). In short, all samples and reagents were prepared and loaded into the chip.  
232 Then, *Chromium* controller was used for droplet generation. Reverse transcription was  
233 conducted in the droplets. cDNA was recovered through emulsification and bead purification.  
234 Pre-amplified cDNA was further subjected to library preparation. Libraries were sequenced on  
235 an *Illumina Novaseq 6000* (Illumina, San Diego, USA). All the sequencing data are available in  
236 GEO under the accession number GSE142201.

237



## 238 **2.7 | Data analysis**

239 For scRNAseq, 10x Genomics Cell Ranger v3.0.1 pipelines were used for data processing and  
240 analysis. The "cellranger mkfastq" was used to produce fastq files and "cellranger count" to  
241 perform alignment, filtering and UMI counting. Alignment was done against mouse genome  
242 GRCm38/mm10. The resultant individual count data were finally aggregated with "cellranger  
243 aggr". Further, the filtered aggregated feature-barcode matrix was checked for quality and  
244 normalization using R package Seurat (Stuart et al., 2019). Only cells with  $\geq 20$  genes and  
245 genes expressed in at least 3 cells were considered for all the downstream analysis. For a robust  
246 set of cells for the expression level calculations, we limited the analyses to 30930 cells that had  
247 transcripts from 3000 to 9000 genes (7000 to 180000 unique molecular identifiers) with less  
248 than 10% of the transcripts being mitochondrial. For comparison with bulk RNAseq data (Figs  
249 3), single-cell data was normalized with DeSeq2 (Love, Huber, & Anders, 2014) together with  
250 the corresponding bulk RNAseq samples, and median expression levels were plotted. The  
251 average cell-level expression (Figure 4B) of a gene  $X$  was calculated as

$$252 \quad X = \frac{\sum_{k=1}^n NX_k}{\sum[NX_k > 1]},$$

253 where  $NX_k$  is normalized expression of gene  $X$  in cell  $k$  and the denominator is the count of cells  
254 with non-zero reads. All statistical tests corresponding to Tables S3 and S4 were performed  
255 using R package "rcompanion" (Mangiafico, 2019) and custom R scripts.

256

## 257 **3 | RESULTS**

### 258 **3.1 | Especially progression genes show elevated expression at the onset of** 259 **tooth patterning**

260 For a robust readout of gene expression profiles, we first obtained gene expression levels using  
261 both microarray and RNAseq techniques from E13 (bud stage) and E14 (cap stage) mouse  
262 molars (Materials and Methods). From dissected tooth germs we obtained five microarray and  
263 seven RNAseq replicates for both developmental stages. The results show that especially the  
264 progression category genes (genes required for the progression of tooth development) are highly  
265 expressed during E13 compared to the control gene sets (tissue, dispensable, and  
266 developmental-process categories,  $p$  values range from 0.0003 to 0.0426 for RNAseq and  
267 microarray experiments, tested using random resampling, for details and all the tests, see  
268 Materials and Methods, Figure 2, Tables S2, S3). Comparable differences are observed in E14

269 molars ( $p$  values range from 0.0000 to 0.0466, Figure 2, Tables S2, S3).

270

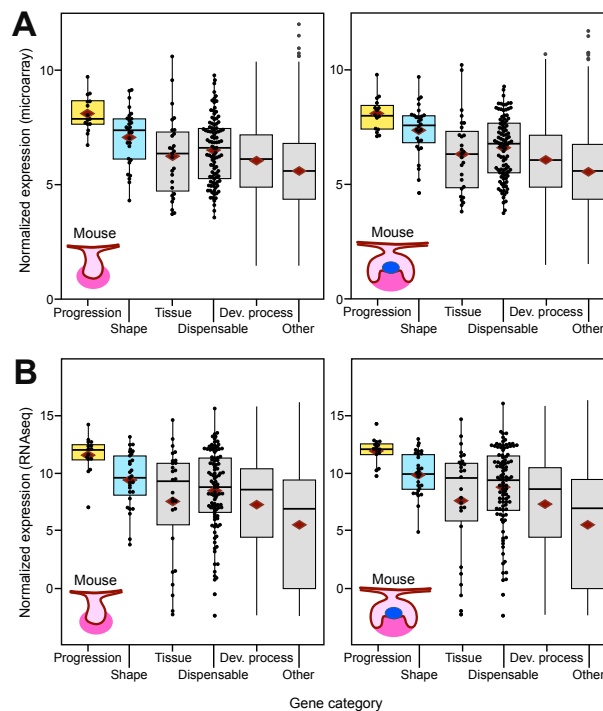

271

272 **Figure 2** Bud and cap stage mouse molars show elevated expression of progression and shape genes.

273 (A) Microarray and (B) RNAseq analyses of the transcriptomes of E13 and E14 molars show highly

274 elevated expression of progression category and moderately elevated shape category genes (for tests,

275 see Table S3). Tissue category genes are involved in dentine and enamel formation that begin at birth,

276 around six days from the E14 cap stage. The number of genes having RNAseq expression data in each

277 category are 15, 28, 27, 100, 4106, and 16165 for progression, shape, tissue, dispensable,

278 developmental process, and other, respectively. The corresponding numbers for the microarray data are

279 15, 28, 27, 98, 3983, and 14825. Boxes enclose 50% of observations; the median and mean are

280 indicated with a horizontal bar and diamond, respectively, and whiskers extend to last values within 1.5

281 interquartiles. Individual data points are shown for the smaller categories.

282

283 In general, the expression differences between progression and tissue categories appear greater

284 than between progression and dispensable categories ( $p$  values range from 0.0028 to 0.0379 and

285 0.0059 to 0.0466, respectively, Table S3), suggesting that some of the genes in the dispensable

286 category may still play a functional role in tooth development. In our data we have 11 genes that

287 cause a developmental arrest of the tooth when double mutated (Appendix S1). The expression

288 level of this double-mutant category shows incipient upregulation compared to that of the

289 developmental-process category ( $p$  values range from 0.0322 to 0.1637 Table S3), but not when

290 compared to the tissue or dispensable categories ( $p$  values range from 0.0978 to 0.5010, Table  
291 S3). Therefore, it is plausible, based on the comparable expression levels between double and  
292 some of the dispensable category genes, that several of the genes in the dispensable category  
293 may cause phenotypic effects when mutated in pairs.

294

295 Even though expression levels of the shape category genes (genes required for normal shape  
296 development) are lower than that of the progression category (Figure 2), at least the E14  
297 microarray data suggests elevated expression levels relative to all the other control categories ( $p$   
298 values range from 0.0001 to 0.0901, Table S3). The moderately elevated levels of expression by  
299 the shape category genes could indicate that they are required slightly later in development, or  
300 that the most robust upregulation happens only for genes that are essential for the progression of  
301 the development. The latter option seems to be supported by a RNAseq analysis of E16 molar,  
302 showing only slight upregulation of shape category genes in the bell stage molars (Table S3).

303

### 304 **3.2 | Transcriptomes of developing rat molars show elevated expression of the** 305 **progression genes**

306 Because our gene categories were based on experimental evidence from the mouse, we also  
307 tested whether comparable expression levels can be detected for the same genes in the rat.  
308 Evolutionary divergence of *Mus-Rattus* dates back to the Middle Miocene (Kimura et al., 2015),  
309 allowing a modest approximation of conservation in the expression levels. Examination of bud  
310 (E15) and cap (E17) stage RNAseq of rat molars shows comparable upregulation of progression  
311 and shape category genes as in the mouse (Figure 3, Table S2, S3). Considering also that many  
312 of the null mutations in keystone gene in the mouse are known to have comparable phenotypic  
313 effects in humans (Nieminen, 2009), our keystone gene categories and analyses are likely to  
314 apply to mammalian teeth in general.

315

316 One complication of our expression level analyses is that these have been done at the whole  
317 organ level. Because many of the genes regulating tooth development are known to have  
318 spatially complex expression patterns within the tooth (Nieminen et al. 1998), cell-level  
319 examinations are required to decompose the patterns within the tissue.

320

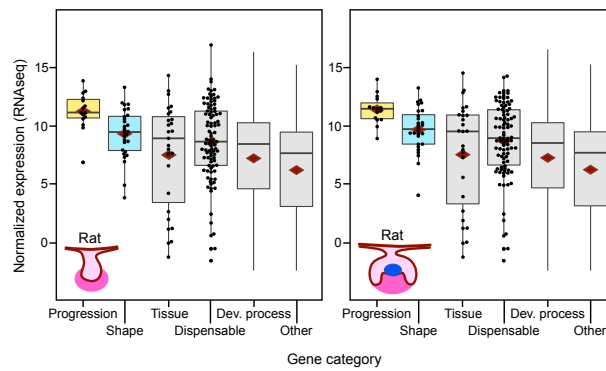

321

322

323

324

325

326

327

328

329

330

331

**Figure 3** Bud and cap stage rat molars show elevated expression of keystone genes. RNAseq analyses of the transcriptomes of E15 and E17 rat molars show highly elevated expression of progression category and moderately elevated shape category genes (for tests, see Table S3). The numbers of genes having RNAseq expression data in each category are 15, 28, 27, 95, 3843, and 12473 for progression, shape, tissue, dispensable, developmental process, and other, respectively. Boxes enclose 50% of observations; the median and mean are indicated with a horizontal bar and diamond, respectively, and whiskers extend to last values within 1.5 interquartiles. Individual data points are shown for the smaller categories.

332

333

334

335

336

337

338

339

340

341

342

### 3.3 | Single-cell RNAseq reveals cell-level patterns of keystone genes

Tooth development is punctuated by iteratively forming epithelial signaling centers, the enamel knots. The first, primary enamel knot, is active in E14 mouse molar and at this stage many genes are known to have complex expression patterns. Some progression category genes have been reported to be expressed in the enamel knot, whereas others have mesenchymal or complex combinatorial expression patterns (Jernvall & Thesleff, 2012; Nieminen et al., 1998). To quantify these expression levels at the cell-level, we performed a single-cell RNAseq (scRNAseq) on E14 mouse molars (Materials and Methods). We focused on capturing a representative sample of cells by dissociating each tooth germ without cell sorting ( $n = 4$ ). After data filtering, 7000 to 8811 cells per tooth were retained for the analyses, providing 30930 aggregated cells for a relatively good proxy of the E14 mouse molar (Materials and Methods).

343

344

345

346

347

First we examined whether the scRNAseq produces comparable expression levels to our previous analyses. For the comparisons, the gene count values from the cells were summed up and treated as bulk RNAseq data (Figure 4A, Materials and Methods). We analyzed the expression levels of different gene categories as in the mouse bulk data (Figure 2) and the results show a general agreement between the experiments (Figure 2, 4B). As in the previous

348 analyses (Table S3), the progression category shows the highest expression levels compared to  
349 the control gene sets ( $p$  values range from 0.0071 to 0.0310, Table S3). Although the mean  
350 expression of the shape category is intermediate between progression and control gene sets,  
351 scRNAseq shape category is not significantly upregulated in the randomization tests ( $p$  values  
352 range from 0.7788 to 0.9968). This pattern reflects the bulk RNAseq analyses (for both mouse  
353 and rat) while the microarray analysis showed slightly stronger upregulation, suggesting subtle  
354 differences between the methodologies (the used mouse strain was also different in the  
355 microarray experiment).

356

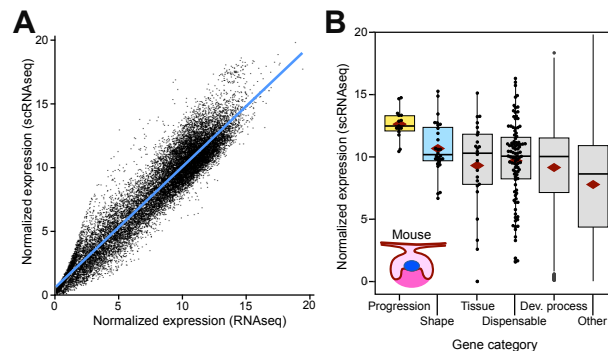

357

358 **Figure 4** Single-cell RNAseq data reflect the bulkRNA analyses. (A) Bulk and scRNAseq expression  
359 levels show overall correspondence in tissue level expression in E14 mouse molar. (B) Progression  
360 category genes show the strongest upregulation whereas shape category is intermediate between the  
361 progression and other categories (for tests, see Table S3). The number of genes having expression data  
362 in each category are 15, 28, 25, 99, 3771, and 16362 for progression, shape, tissue, dispensable,  
363 developmental process, and other, respectively. Boxes in (B) enclose 50% of observations; the median  
364 and mean are indicated with a horizontal bar and diamond, respectively, and whiskers extend to last  
365 values within 1.5 interquartiles. Individual data points are shown for the smaller categories.

366

367 Unlike the bulk transcriptome data, the scRNAseq data can be used to quantify the effect of  
368 expression domain size on the overall expression level of a gene. The importance of expression  
369 domain size is well evident in the scRNAseq data when we calculated the number of cells that  
370 express each gene (Materials and Methods). The data shows that the overall tissue level gene  
371 expression is highly correlated with the cell population size (Figure 5A). In other words, the size  
372 of the expression domain is the key driver of expression levels measured at the whole tissue  
373 level.

374

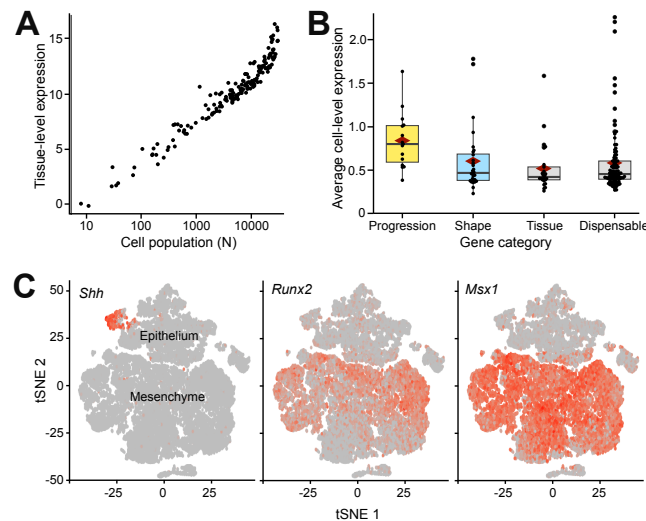

375

376 **Figure 5** Expression domain size and high cell-level transcript abundance of progression genes. (A)  
377 The size of the expression domain, measured as the number of cells, is the key driver of organ level  
378 expression (scRNAseq on E14 mouse molar, plotted for progression, shape, tissue, and dispensable  
379 category genes). (B) Progression category shows high cell-level expression or transcript abundance,  
380 indicating high expression relative to the expression domain size. The  $p$  values for progression, shape,  
381 and tissue categories compared to dispensable category are 0.0008, 0.7009, 0.3413, respectively (one-  
382 tailed significance levels obtained using 10 000 permutations). (C) tSNE plots showing diverse  
383 expression patterns of three different progression category genes in the scRNAseq data. Clusters  
384 containing epithelial and mesenchymal cells are marked (note the limited presence of mesenchymal  
385 marker *Msx1* transcripts in the epithelium, agreeing with previous reports by Coudert et al., 2005). Boxes  
386 in (B) enclose 50% of observations; the median and mean are indicated with a horizontal bar and  
387 diamond, respectively, and whiskers extend to last values within 1.5 interquartiles.

388

389 To examine the cell level patterns further, we calculated the mean transcript abundances for  
390 each gene for the cells that express that gene (see Material and Methods). This metric  
391 approximates the cell-level upregulation of a particular gene, and is thus independent of the size  
392 of the expression domain. We calculated the transcript abundance values for progression, shape,  
393 tissue, double, and dispensable category genes in each cell that expresses any of those genes.  
394 The resulting mean transcript abundances were contrasted to that of the dispensable category  
395 (Materials and Methods). The results show that the average transcript abundance is high in the  
396 progression category whereas the other categories show roughly comparable transcript  
397 abundances (Figure 5B). Considering that the progression category genes have highly  
398 heterogeneous expression patterns (e.g., Nieminen et al. 1998, Figure 5C), their high cell-level  
399 transcript abundance (Figure 5B) is suggestive about their critical role at the cell level. That is,

400 progression category genes are not only highly expressed at the tissue level because they have  
401 broad expression domains, but rather because they are upregulated in individual cells  
402 irrespective of domain identity or size. These results suggest that high cell-level transcript  
403 abundance is a system-level feature of genes essential for the progression of tooth development,  
404 a pattern that seems to be shared with essential genes of single cell organisms (Dong et al.,  
405 2018). We note that although the dispensable category has several genes showing comparable  
406 expression levels with that of the progression category genes at the tissue level (Figure 2), their  
407 cell-level transcript abundances are predominantly low (Figure 5B).

408

409 Next we examined more closely the differences between progression and shape category genes,  
410 and to what extent the upregulation of the keystone genes reflects the overall expression of the  
411 corresponding pathways.

412

### 413 **3.4 | Keystone gene upregulation in the context of their pathways**

414 In our data the developmental-process genes appear to have slightly elevated expression levels  
415 compared to the other protein coding genes (Figs 2, 3, 4B), suggesting an expected and general  
416 recruitment of the pathways required for organogenesis. To place the progression and shape  
417 category genes into the specific context of their corresponding pathways, we investigated in E14  
418 mouse bulk RNAseq whether the pathways implicated in tooth development show elevated  
419 expression levels. Six pathways, Fgf, Wnt, Tgf $\beta$ , Hedgehog (Hh), Notch, and Ectodysplasin  
420 (Eda), contain the majority of progression and shape genes (Materials and Methods). First we  
421 used the RNAseq of E14 stage molars to test whether these pathways show elevated expression  
422 levels. We manually identified 272 genes belonging to the six pathways (Materials and  
423 Methods, Table S4). Comparison of the median expression levels of the six-pathway genes with  
424 the developmental-process genes shows that the pathway genes are a highly upregulated set of  
425 genes (Figure 6A,  $p < 0.0001$ , random resampling). This difference suggests that the  
426 experimentally identified progression and shape genes might be highly expressed partly because  
427 they belong to the developmentally upregulated pathways. To specifically test this possibility,  
428 we contrasted the expression levels of the progression and shape genes to the genes of their  
429 corresponding signaling families.

430

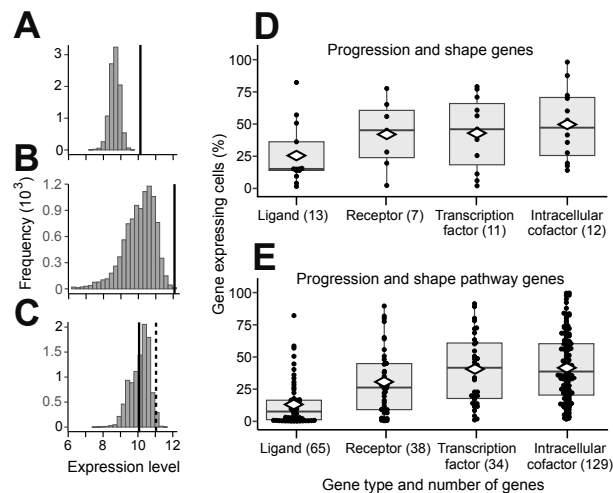

431

432

433

434

435

436

437

438

439

440

441

442

443

444

445

446

447

448

449

450

451

452

453

454

455

456

**Figure 6** Restricted expression of ligands explains differences in upregulation. (A) Compared to all the developmental process genes, the pathways containing progression and shape category genes are generally upregulated ( $p < 0.0001$ , black line, random sampling using median expression levels and 10 000 permutations). (B) Median expression of progression genes (black line) shows further upregulation compared to all the genes in the corresponding pathways ( $p = 0.0004$ ). (C) Median expression of shape category genes (black line) shows comparable expression with the genes in the corresponding pathways ( $p = 0.5919$ ), but excluding ligands makes the shape category genes highly expressed ( $p = 0.0154$ , black dashed line). (D) Of the progression and shape category genes, ligands are expressed in fewer number of cells compared to the non-secreted proteins. (E) Ligands are also expressed in relatively few cells among all the pathway genes. Analyses using E14 mouse bulk RNAseq (A–C) and E14 scRNAseq (D, E). The  $p$  value for ligands in (D) and (E) are  $p < 0.0001$  (random sampling compared to all the other gene types). Boxes in (D, E) enclose 50% of observations; the median and mean are indicated with a horizontal bar and diamond, respectively, and whiskers extend to last values within 1.5 interquartiles.

The 15 progression category genes belong to four signaling families (Wnt, Tgf $\beta$ , Fgf, Hh) with 221 genes in our tabulations. Even though these pathways are generally upregulated in the E14 tooth, the median expression level of the progression category is still further elevated (Figure 6B,  $p < 0.0001$ ). In contrast, the analyses for the 28 shape category genes and their corresponding pathways (272 genes from Wnt, Tgf $\beta$ , Fgf, Hh, Eda, Notch) show comparable expression levels (Figure 6C,  $p = 0.5919$ ). Whereas this contrasting pattern between progression and shape genes within their pathways may explain the subtle upregulation of the shape category (Figure 2), the difference warrants a closer look. Examination of the two gene categories reveals that compared to the progression category genes, relatively large proportion of the shape category genes are ligands (36% shape genes compared to 20% progression genes, Appendix S1). In our E14 scRNAseq data, ligands show generally smaller expression domains



457 than other genes (roughly by half, Figure 6D, E), and the low expression of the shape category  
458 genes seems to be at least in part driven by the ligands (Figure 6C, Table S5).

459

460 Overall, the upregulation of the keystone genes within their pathways appears to be influenced  
461 by the kind of proteins they encode. In this context it is noteworthy that patterning of tooth  
462 shape requires spatial regulation of secondary enamel knots and cusps, providing a plausible  
463 explanation for the high proportion of genes encoding diffusing ligands in the shape category.

464

#### 465 **4 | DISCUSSION**

466 Identification and mechanistic characterization of developmentally essential or important genes  
467 have motivated a considerable research effort (e.g. Amsterdam et al., 2004; Brown et al., 2018;  
468 Bogue et al., 2018; Dickinson et al., 2016). One general realization has been that despite the  
469 large number of genes being dynamically expressed during organogenesis, only a subset appears  
470 to have discernable effects on the phenotype. This parallels with the keystone species concept  
471 used in ecological research (Paine, 1969; Terborgh, 1986). Keystone species, that may include  
472 relatively few species in a community, are thought to have disproportionately large influence on  
473 their environment. Similarly, keystone genes of development, while not necessarily essential for  
474 life, have disproportionately large effects on the phenotypic outcome of their system. Here we  
475 took advantage of this kind of in-depth knowledge on the details of the phenotypic effects of  
476 various developmental genes (Appendix S1). This allowed us to classify genes into different  
477 categories ranging from essential to 'less essential' and all the way to dispensable. Obviously, as  
478 in ecological data, our category groupings can be considered a work in progress as new genes  
479 and reclassifications are bound to refine the patterns. Nevertheless, our analyses should provide  
480 some robust inferences.

481

482 Most notably, genes that are essential for the progression of mouse molar development were  
483 highly expressed (Figs 2–4). These genes were highly expressed even within their pathways  
484 (Figure 6A, B) and had markedly high cell-level transcript abundances (Figure 5B). This pattern  
485 conforms to analyses of single cell organisms (Dong et al., 2018), thereby supporting expression  
486 level as one general criterion for essential genes. The high expression level of progression  
487 category genes may well signify their absolute requirement during the cap stage of tooth  
488 development. Indeed, it is typically by this stage that a developmental arrest happens when

489 many of the progression genes are null mutated. Interestingly, mice heterozygous for the null-  
490 mutated progression genes appear to have normal teeth (Appendix S1). A possible hypothesis to  
491 be explored is to examine whether the high cell-level transcript abundance of the progression  
492 category is a form of haplosufficiency in which the developmental system is buffered against  
493 mutations affecting one allele. Another possibility, that has some experimental support (Benazet  
494 et al., 2009), is that there are regulatory feedbacks to boost gene expression to compensate for a  
495 null-allele. In contrast to the progression category, gene pairs arresting tooth development as  
496 double mutants have relatively low expression levels, perhaps suggestive that several genes in  
497 the dispensable category could be redundant to each other. This redundancy could contribute to  
498 the overall robustness of tooth development.

499

500 Because all the studied progression and shape category genes are involved in the development  
501 of multiple organ systems, our results may evolutionarily point to cis-regulatory differences that  
502 specifically promote the expression of these genes in an organ specific manner. Consequently,  
503 species that are less reliant on teeth (e.g., some seals) or have rudimentary teeth (e.g., baleen  
504 whales) can be predicted to have lowered expression levels of the progression genes.

505 Nevertheless, at an organism level, our gene categories should not be considered as indicative of  
506 having simple effects on individual fitness. For example, producing offspring, which have  
507 defective enamel, could be more costly to the mammalian parent than offspring with a null  
508 mutation causing an arrest of tooth development with comparable defects in other organ  
509 systems, and thus early lethality. That our results may apply to other species than the mouse is  
510 supported by the similarity of the organ level expression patterns in the mouse and the rat  
511 (Figure 3), as also by the generally comparable phenotypic effects of mutations in the mouse  
512 and in the human (Nieminen, 2009). Therefore, we suggest that even though gene expression  
513 profiles may differ in details among species, the overall, high-level patterns of essential gene  
514 expression dynamics should be evolutionarily conserved.

515

516 Towards the general attempt to understand the numerous genes expressed in a developing organ  
517 system, our results point to the potential to use cell-level expression levels to identify genes  
518 critical for organogenesis. Here the single-cell transcriptomes provided a more nuanced view  
519 into the spatial patterns of the different gene categories than the tissue level transcriptomes  
520 alone, which mostly reflect the size of the expression domain (Figure 5A). In our tabulation,

521 over a third of the shape category genes were ligands. Tooth shape patterning involves spatial  
522 placement of signaling centers that in turn direct the growth and folding of the tissue (Jernvall &  
523 Thesleff, 2012). The involvement of several secreted ligands in this patterning process, and  
524 consequently in the shape category, is likely to reflect the requirement of the developmental  
525 machinery to produce functional cusp patterns. These cusp patterns are also a major target of  
526 natural selection because evolutionary diversity of mammalian teeth largely consists of different  
527 cusp configurations. At the same time, partly due to ligands having generally more restricted  
528 expression domains compared to receptors and intracellular proteins, the shape category  
529 expression levels were found to be generally lower than that of the progression category. That  
530 ligands tend to have smaller expression domains whereas receptors have broader expression  
531 domains for tissue competence has been recognized in many unrelated studies (e.g. Bachler &  
532 Neubüser, 2001; Wessells, Grumbling, Donaldson, Wang, & Simcox, 1999; and partly in  
533 Salvador-Martínez & Salazar-Ciudad, 2015), but our analyses suggest that this is a general  
534 principle detectable in system-level transcriptome data. This pattern is also compatible with the  
535 classic concepts of tissue competence and evocators or signals produced by organizers  
536 (Waddington, 1940). Nevertheless, it remains to be explored spatially how the low signal-  
537 competence ratio emerges from highly heterogeneous expression domains of various genes, and  
538 within the complex three-dimensional context of a developing tooth (e.g., Harjunmaa et al.,  
539 2014; Pantalacci et al., 2015; Krivanek et al., 2020). In our data (for accession number, see  
540 Materials and Methods), at least the ligand *Eda* is expressed in a larger number of cells than its  
541 receptor *Edar*, suggesting that there are individual exceptions to the general pattern. Another  
542 potentially interesting observation is that *Sostdc1* and *Fst*, both secreted sequesters or inhibitors  
543 of signaling, were among the most broadly expressed of the ligands. Thus, at least some of the  
544 exceptions to the low signal-competence ratio may be modulators of tissue competence.

545

546 In conclusions, the over 20 000 genes of mammalian genomes, and even higher numbers in  
547 many plant genomes, call for systems to categorize them. Especially the high-throughput  
548 experiments have accentuated the need for comprehension of the bigger picture in genome-wide  
549 analysis. However, there is no single way to do the classification of genes. Biological  
550 complexity offers a multitude of ways to categorize, ranging from structural to functional  
551 characteristics, and from evolutionary relationships to location of expression. Here our aim was  
552 to create a categorization that would provide insight to systems-level understanding of

553 organogenesis and still include organ level details. By combining the experimental evidence on  
554 the effects of gene null-mutations with single-cell level transcriptome data, we uncovered  
555 potential generalities affecting expression levels of genes in a developing system. With  
556 advances in the analyses of transcriptomes and gene regulation, it will be possible to explore  
557 experimental data from other organs and species to test and identify system level principles of  
558 organogenesis.

559

## 560 **ACKNOWLEDGEMENTS**

561 We thank I. Salazar-Ciudad and S. F. Gilbert for advice and the members of the Center of  
562 Excellence in Experimental and Computational Developmental Biology Research for  
563 discussions. We thank A. Viherä for technical assistance. We thank P. Auvinen, L. Paulin and P.  
564 Laamanen at DNA Sequencing and Genomics Laboratory for bulk RNA sequencing. We thank  
565 J. Lahtela at FIMM Single Cell Analytics for single cell RNA sequencing.

566

## 567 **FUNDING**

568 Financial support was provided by the Academy of Finland, Jane and Aatos Erkko Foundation,  
569 and John Templeton Foundation.

570

## 571 **CONFLICT OF INTERESTS**

572 The authors declare that there is no conflict of interests.

573

## 574 **REFERENCES**

- 575 Amsterdam, A., Nissen, R. M., Sun, Z., Swindell, E. C., Farrington, S., & Hopkins, N. (2004).  
576 Identification of 315 genes essential for early zebrafish development. *Proceedings of the National*  
577 *Academy of Sciences*, *101*, 12792-12797. <https://doi.org/10.1073/pnas.0403929101>
- 578 Anders, S., Pyl, P. T., & Huber, W. (2015). HTSeq--a Python framework to work with high-throughput  
579 sequencing data. *Bioinformatics*, *31*, 166-169. <https://doi.org/10.1093/bioinformatics/btu638>
- 580 Andrews, S., Krueger, F., Segonds-Pichon, A., Biggins, L., Krueger, C., & Wingett, S. (2012).  
581 {FastQC}.
- 582 Ashburner, M., Ball, C. A., Blake, J. A., Botstein, D., Butler, H., Cherry, J. M., ... Sherlock, G. (2000).  
583 Gene Ontology: tool for the unification of biology. *Nature Genetics*, *25*, 25-29.  
584 <https://doi.org/10.1038/75556>

- 585 Bachler, M., & Neubüser, A. (2001). Expression of members of the Fgf family and their receptors during  
586 midfacial development. *Mechanisms of Development*, *100*(2), 313-316.  
587 [https://doi.org/10.1016/s0925-4773\(00\)00518-9](https://doi.org/10.1016/s0925-4773(00)00518-9)
- 588 Bei, M. (2009) Molecular genetics of tooth development. *Current opinion in Genetics & Development*,  
589 *19*(5), 504-510. <https://doi.org/10.1016/j.gde.2009.09.002>
- 590 Benazet, J.-D., Bischofberger, M., Tiecke, E., Goncalves, A., Martin, J. F., Zuniga, A., ... Zeller, R.  
591 (2009). A Self-Regulatory System of Interlinked Signaling Feedback Loops Controls Mouse Limb  
592 Patterning. *Science*, *323*(5917), 1050-1053. <https://doi.org/10.1126/science.1168755>
- 593 Bengtsson, H., Irizarry, R., Carvalho, B., & Speed, T. P. (2008). Estimation and assessment of raw copy  
594 numbers at the single locus level. *Bioinformatics*, *24*(6), 759-767.  
595 <https://doi.org/10.1093/bioinformatics/btn016>
- 596 Bogue, M. A., Grubb, S. C., Walton, D. O., Philip, V. M., Kolishovski, G., Stearns, T., ... Chesler, E. J.  
597 (2018). Mouse Phenome Database: an integrative database and analysis suite for curated empirical  
598 phenotype data from laboratory mice. *Nucleic Acids Research*, *46*(Database issue), D843.  
599 <https://doi.org/10.1093/NAR/GKX1082>
- 600 Bolger, A. M., Lohse, M., & Usadel, B. (2014). Trimmomatic: a flexible trimmer for Illumina sequence  
601 data. *Bioinformatics*, *30*(15), 2114-2120. <https://doi.org/10.1093/bioinformatics/btu170>
- 602 Brown, S. D. M., Holmes, C. C., Mallon, A.-M., Meehan, T. F., Smedley, D., & Wells, S. (2018). High-  
603 throughput mouse phenomics for characterizing mammalian gene function. *Nature Reviews*.  
604 *Genetics*, *19*(6), 357-370. <https://doi.org/10.1038/s41576-018-0005-2>
- 605 Carlson, M. (2019). *org.Mm.eg.db: Genome wide annotation for Mouse*.
- 606 Chen, S., Huang, T., Zhou, Y., Han, Y., Xu, M., & Gu, J. (2017). AfterQC: automatic filtering,  
607 trimming, error removing and quality control for fastq data. *BMC Bioinformatics*, *18*(Suppl 3), 80.  
608 <https://doi.org/10.1186/s12859-017-1469-3>
- 609 Coudert, A. E., Pibouin, L., Vi-Fane, B., Thomas, B. L., Macdougall, M., Choudhury, A., ... Lezot, F.  
610 (2005). Expression and regulation of the Msx1 natural antisense transcript during development.  
611 *Nucleic Acids Research*. <https://doi.org/10.1093/nar/gki831>
- 612 Dai, M., Wang, P., Boyd, A. D., Kostov, G., Athey, B., Jones, E. G., ... Meng, F. (2005). Evolving  
613 gene/transcript definitions significantly alter the interpretation of GeneChip data. *Nucleic Acids*  
614 *Research*, *33*(20), e175-e175. <https://doi.org/10.1093/nar/gni179>
- 615 Dickinson, M. E., Flenniken, A. M., Ji, X., Teboul, L., Wong, M. D., White, J. K., ... Murray, S. A.  
616 (2016). High-throughput discovery of novel developmental phenotypes. *Nature*, *537*(7621), 508-  
617 514. <https://doi.org/10.1038/nature19356>
- 618 Dobin, A., Davis, C. A., Schlesinger, F., Drenkow, J., Zaleski, C., Jha, S., ... Gingeras, T. R. (2013).

- 619 STAR: ultrafast universal RNA-seq aligner. *Bioinformatics*, 29(1), 15-21.  
620 <https://doi.org/10.1093/bioinformatics/bts635>
- 621 Dong, C., Jin, Y. T., Hua, H. L., Wen, Q. F., Luo, S., Zheng, W. X., & Guo, F. B. (2018).  
622 Comprehensive review of the identification of essential genes using computational methods:  
623 Focusing on feature implementation and assessment. *Briefings in Bioinformatics*, 21(1), 171-181.  
624 <https://doi.org/10.1093/bib/bby116>
- 625 Durinck, S., Moreau, Y., Kasprzyk, A., Davis, S., De Moor, B., Brazma, A., & Huber, W. (2005).  
626 BioMart and Bioconductor: A powerful link between biological databases and microarray data  
627 analysis. *Bioinformatics*. <https://doi.org/10.1093/bioinformatics/bti525>
- 628 Harjunmaa, E., Kallonen, A., Voutilainen, M., Hämäläinen, K., Mikkola, M. L., & Jernvall, J. (2012).  
629 On the difficulty of increasing dental complexity. *Nature*, 483(7389), 324-327.  
630 <https://doi.org/10.1038/nature10876>
- 631 Harjunmaa, E., Seidel, K., Häkkinen T., Renvoisé, E., Corfe, I. J., Kallonen, A., Zhang, Z.-G., Evans, A.  
632 R., Mikkola, M. L., Salazar-Ciudad, I., Klein, O. D. & Jernvall, J. (2014). Replaying evolutionary  
633 transitions from the dental fossil record. *Nature*, 512, 44-48. <https://doi.org/10.1038/nature13613>
- 634 Jernvall, J., & Thesleff, I. (2012). Tooth shape formation and tooth renewal: evolving with the same  
635 signals. *Development (Cambridge, England)*, 139(19), 3487-3497.  
636 <https://doi.org/10.1242/dev.085084>
- 637 Kimura, Y., Hawkins, M. T. R., McDonough, M. M., Jacobs, L. L., & Flynn, L. J. (2015). Corrected  
638 placement of *Mus-Rattus* fossil calibration forces precision in the molecular tree of rodents.  
639 *Scientific Reports*. <https://doi.org/10.1038/srep14444>
- 640 Kirvanek et al. (2020). Dental cell type atlas reveals stem and differentiated cell types in mouse and  
641 human teeth. *Nature communications* 11, 4816 <https://doi.org/10.1038/s41467-020-18512-7>
- 642 Love, M. I., Huber, W., & Anders, S. (2014). Moderated estimation of fold change and dispersion for  
643 RNA-seq data with DESeq2. *Genome Biology*, 15(12), 550. [https://doi.org/10.1186/s13059-014-](https://doi.org/10.1186/s13059-014-0550-8)  
644 [0550-8](https://doi.org/10.1186/s13059-014-0550-8)
- 645 Mangiafico, S. (2019). rcompanion: Functions to Support Extension Education Program Evaluation.  
646 <https://cran.r-project.org/package=rcompanion>
- 647 Nieminen, P, Pekkanen, M., Aberg, T., & Thesleff, I. (1998). A graphical WWW-database on gene  
648 expression in tooth. *European Journal of Oral Sciences*, 106 Suppl(S1), 7-11.  
649 <https://doi.org/10.1111/j.1600-0722.1998.tb02146.x>
- 650 Nieminen, Pekka. (2009). Genetic basis of Tooth agenesis. *Journal of Experimental Zoology Part B:*  
651 *Molecular and Developmental Evolution*, 312(4), 320-342. <https://doi.org/10.1002/jez.b.21277>
- 652 Paine, R. T. (1969). A Note on Trophic Complexity and Community Stability. *The American Naturalist*,

- 653 *103*(929), 91-93. <https://www.jstor.org/stable/2459472>
- 654 Pantalacci, S., Guéguen, L., Petit, C., Lambert, A., Peterkova, R. & Sémon, M. (2017). Transcriptomic  
655 signatures shaped by cell proportions shed light on comparative developmental biology. *BMC*  
656 *Genome Biology*, *18*, 29 <https://doi.org/10.1186/s13059-017-1157-7>
- 657 Salvador-Martínez, I., & Salazar-Ciudad, I. (2015). How complexity increases in development: An  
658 analysis of the spatial-temporal dynamics of 1218 genes in *Drosophila melanogaster*.  
659 *Developmental Biology*, *405*(2), 328-339. <https://doi.org/10.1016/j.ydbio.2015.07.003>
- 660 Skovmand, L. H., Xu, C. C. Y., Servedio, M. R., Nosil, P., Barrett, R. D. H., & Hendry, A. P. (2018).  
661 Keystone Genes. *Trends in Ecology & Evolution*, *33*(9), 689-700.  
662 <https://doi.org/10.1016/j.tree.2018.07.002>
- 663 Stuart, T., Butler, A., Hoffman, P., Hafemeister, C., Papalexi, E., Mauck, W. M., ... Satija, R. (2019).  
664 Comprehensive Integration of Single-Cell Data. *Cell*, *177*(7), 1888-1902.e21.  
665 <https://doi.org/10.1016/J.CELL.2019.05.031>
- 666 Terborgh, J. (1986). Keystone plant resources in the tropical forest. In M. E. Soulé (Ed.), *Conservation*  
667 *Biology: The Science of Scarcity and Diversity* (pp. 330-344). Sunderland, MA: Sinauer Associates.
- 668 Waddington, C. H. (1940). *Organisers and Genes*. Cambridge: Cambridge biological studies, University  
669 Press.
- 670 Wessells, R. J., Grumbling, G., Donaldson, T., Wang, S. H., & Simcox, A. (1999). Tissue-specific  
671 regulation of vein/EGF receptor signaling in *Drosophila*. *Developmental Biology*, *216*(1), 243-259.  
672 <https://doi.org/10.1006/dbio.1999.9459>
- 673
- 674
